# Supplementary material
Source: ML conference proceedings conference paper supplement (https://aclanthology.org/D18-1265)
Supplement: Attachment [file D18-1265.Attachment.zip]

# Supplementary Material for “Dependency-based Hybrid Trees for Semantic Parsing”

Zhanming Jie and Wei Lu

Singapore University of Technology and Design

8 Somapah Road, Singapore, 487372

zhanming-jie@mymail.sutd.edu.sg, luwei@sutd.edu.sg

## Abstract

This supplementary material provides the further details to the dynamic programming derivations in the main paper (Jie and Lu, 2018).

## References

Zhanming Jie and Wei Lu. 2018. Dependency-based hybrid trees for semantic parsing. In *Proceedings of EMNLP*.

## 1 Complete Derivation

We show the complete dynamic-programming derivation of the example in our main paper. First of all, Figure 1 shows the derivation of each dynamic programming structure.

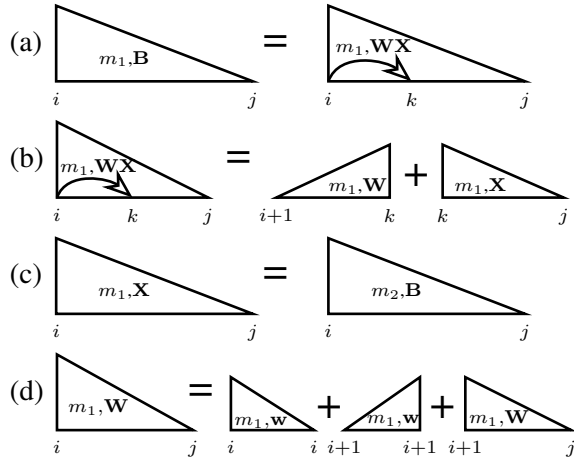

Figure 1: The dynamic-programming structures and derivation of our model. The other direction is symmetric.

Following the derivation, we can compose the tree by combining the smaller spans into bigger spans. Figure 2 and 3 show the complete derivation of the example in the Figure 1 of the main paper. During the decoding phase, we obtain such tree structures as shown in Figure 2 and 3 through a Viterbi procedure. By retrieving the complete arc spans spans in this structure, we can obtain the predicted dependency-based hybrid tree representation which contains the meaning representation.

**Sentence:** *What rivers do not run through Tennessee ?*

**Meaning Representation:** *answer(exclude(river(all),traverse(stateid('tn'))))*

*Dependency-based Hybrid Tree Representation*

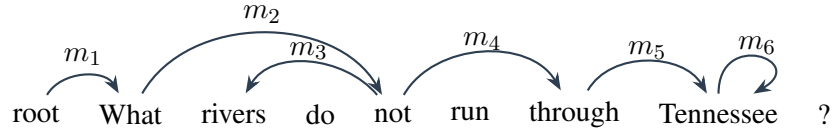

**Dynamic-programming Derivation**

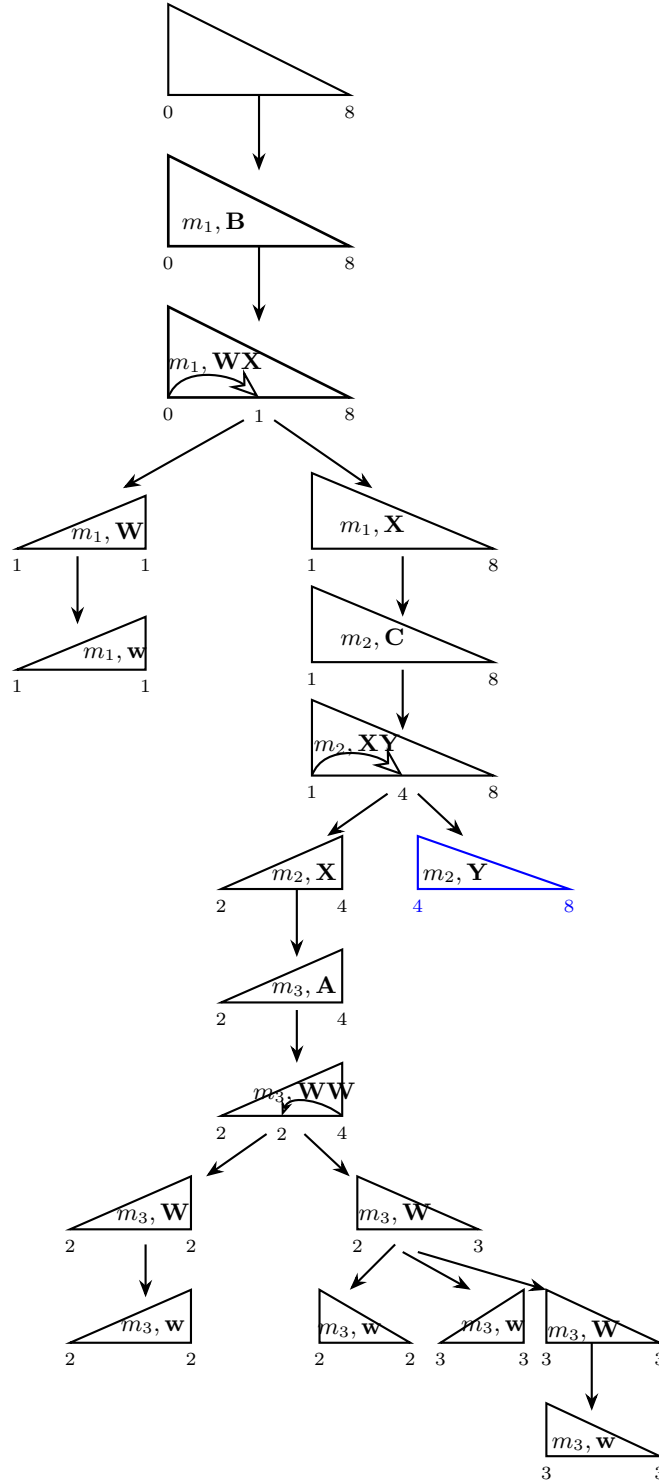

Figure 2: Complete dynamic programming example of the example in the main paper. Derivation for span (4, 8) is shown in Figure 3 due to space limit.

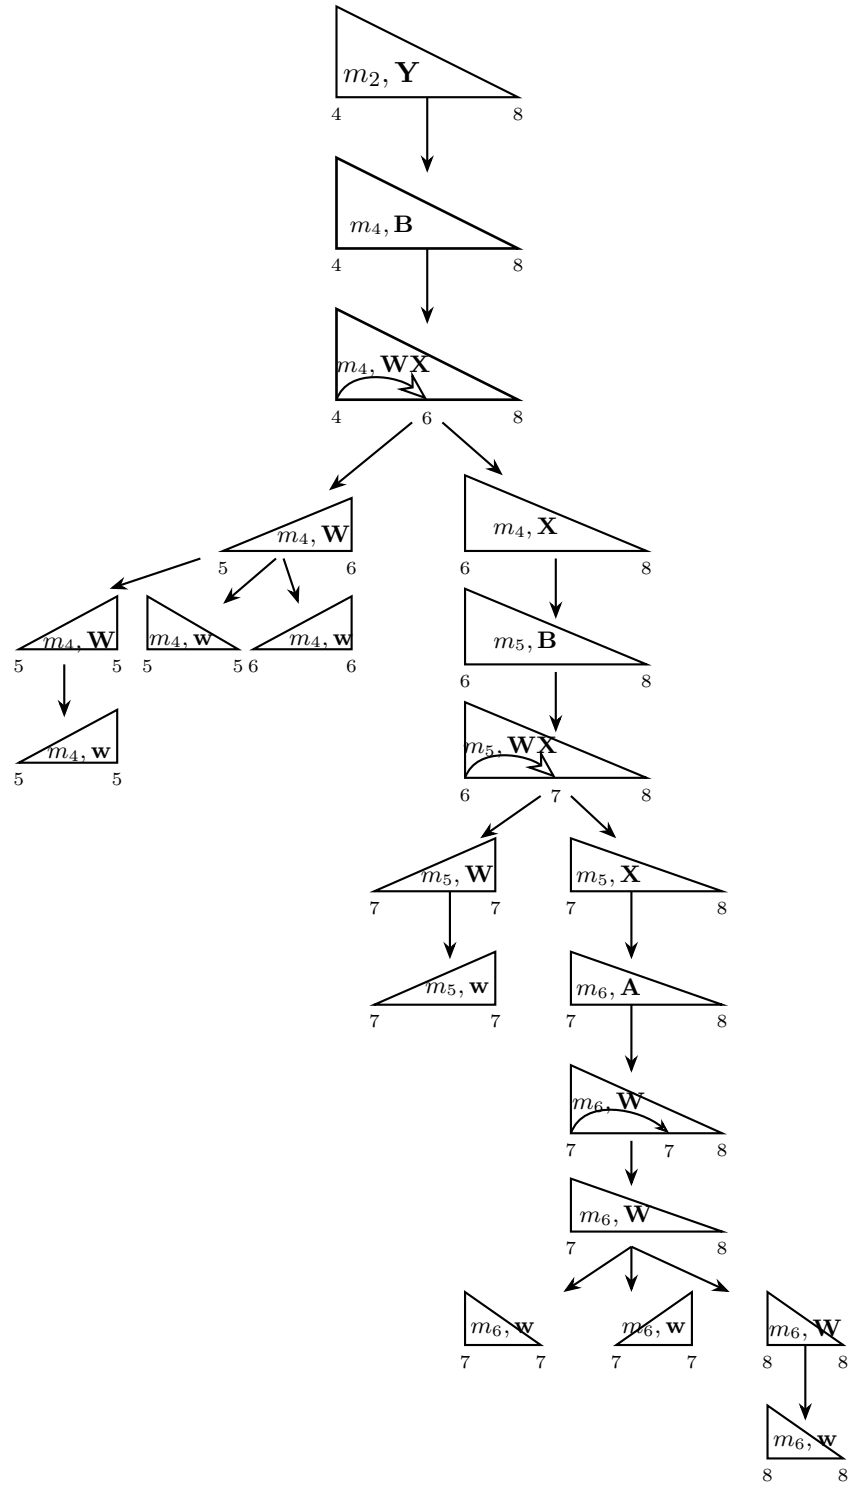

Figure 3: Derivation of span (4, 8) in Figure 2
